# Supplementary material
Source: HighWire-hosted journal article supplement (http://www.qdcxjkg.com/highwire/filestream/121513/field_highwire_adjunct_files/0/ERJ-00281-2015_Supplement.pdf)
Supplement: ERJ-00281-2015_Supplement.pdf [file ERJ-00281-2015_Supplement.pdf]

Supplementary Material

Tables for the 31 outlier patients

**Table S1. Characteristics of the 31 outlier patients.**

|                                                      | Value       |
|------------------------------------------------------|-------------|
| <b>Demographic characteristics</b>                   |             |
| Age, mean $\pm$ SD                                   | 75 $\pm$ 14 |
| $\geq 75$ year old, n (%)                            | 20 (64.5)   |
| Men, n (%)                                           | 11 (35.4)   |
| <b>Co-morbidities to PE</b>                          |             |
| Concurrent symptomatic DVT, n (%)                    | 13 (41.9)   |
| Previous DVT or PE, n (%)                            | 4 (12.9)    |
| <b>ICD-9-CM codes for secondary diagnoses, n (%)</b> |             |
| Active cancer                                        | 1 (3.2)     |
| Chronic bronchitis                                   | 4 (12.9)    |
| Chronic pulmonary heart disease                      | 4 (12.9)    |
| Chronic ischemic heart disease                       | 3 (9.7)     |
| Heart failure                                        | 2 (6.5)     |
| Essential hypertension                               | 3 (9.7)     |
| Diabetes mellitus                                    | 0 (0.0)     |
| Disorders of lipid metabolism                        | 9 (29.0)    |
| Asthma                                               | 0 (0.0)     |
| <b>APR-DRG severity level, n (%)</b>                 |             |
| Minor                                                | 3 (9.7)     |
| Moderate                                             | 7 (22.6)    |
| Major                                                | 18 (58.1)   |
| Extreme                                              | 3 (9.7)     |

**Table S2. Log-transformed total cost (€) per patient according to the APR-DRG severity of illness (SOI) classes (n = 31 outlier patients).**

| <b>SOI class</b> | <b>N patients</b> | <b>Mean cost, € (*)<br/>(95% CI)</b> | <b>CV (%)</b> |
|------------------|-------------------|--------------------------------------|---------------|
| Minor            | 3                 | 6,971<br>(3,193 -15,219)             | 33            |
| Moderate         | 7                 | 12,385<br>(9,099 - 16,854)           | 30            |
| Major            | 18                | 13,098<br>(11,652 – 14,723)          | 26            |
| Extreme          | 3                 | 27,970<br>(11,275 - 69,390)          | 40            |

\*Log costs were de-transformed with 95 % CI.

CV = coefficient of variation in %.

Analysis of variance with polynomial contrasts showed a significant linear trend for SOI ( $p < 0.0001$ ).

**Table S3. Cost components according to the APR-DRG severity of illness class (SOI). Data are presented as mean  $\pm$  SD (n = 31 outlier patients).**

| <b>Cost components</b>        | <b>Minor</b>       | <b>Moderate</b>      | <b>Major</b>         | <b>Extreme</b>       | <b>All patients</b>  |
|-------------------------------|--------------------|----------------------|----------------------|----------------------|----------------------|
| Nursing activities            | 1,870<br>$\pm$ 279 | 4,578<br>$\pm$ 1,988 | 4,362<br>$\pm$ 1,364 | 9,887<br>$\pm$ 1,615 | 4,704<br>$\pm$ 2,364 |
| Medical procedures            | 1,709<br>$\pm$ 460 | 3,011<br>$\pm$ 1,331 | 2,794<br>$\pm$ 375   | 5,623<br>$\pm$ 3,323 | 3,012<br>$\pm$ 1,498 |
| Pharmaceutical products       | 612<br>$\pm$ 449   | 726<br>$\pm$ 487     | 367<br>$\pm$ 359     | 2,853<br>$\pm$ 1,342 | 994<br>$\pm$ 1,082   |
| Hospitalization accommodation | 1,262<br>$\pm$ 450 | 2,212<br>$\pm$ 626   | 2,804<br>$\pm$ 792   | 5,234<br>$\pm$ 3,307 | 2,756<br>$\pm$ 1,444 |
| Administrative costs          | 539<br>$\pm$ 192   | 704<br>$\pm$ 332     | 801<br>$\pm$ 243     | 1,447<br>$\pm$ 729   | 816<br>$\pm$ 379     |

**Table S4. Multivariable linear regression analysis of predictors of log-transformed total costs as dependent variable (n=652 inlier and outlier patients)**

| Predictors                                                                        | Relative increase in cost<br>(95% CI) | p-value |
|-----------------------------------------------------------------------------------|---------------------------------------|---------|
| Age group                                                                         | 1.084 (1.05 – 1.12)                   | 0.001   |
| Chronic Pulmonary Heart Disease                                                   | 1.14 (1.02 - 1.27)                    | 0.016   |
| Heart failure                                                                     | 1.48 (1.23 - 1.79)                    | 0.001   |
| ICU                                                                               | 1.52 (1.32 – 1.73)                    | 0.001   |
| Thrombolysis                                                                      | 1.42 (1.17 – 1.77)                    | 0.002   |
| Type of hospital                                                                  | 1.05 (1.04 – 1.07)                    | 0.001   |
| p < 0.0001 for the model with R <sup>2</sup> = 0.239 for this six variables model |                                       |         |

Comment: the inclusion of the outlier patients does not change the model nor the relative increase in cost but slightly decreases adjusted R<sup>2</sup> from 0.289 to 0.239 (estimation of the parameters and the 95% CI are made using bootstrap technique)
